# Supplementary material
Source: publisher site journal article supplement (https://www.dovepress.com/article/300623)

**Suppl. Figure S1:**  
**Primer specifications relevant for this study.**

| Name           | Primer Seq(5->3)           |
|----------------|----------------------------|
| Beta actin fwd | CCCAGCACAATGAAGATCAA       |
| Beta actin rev | CGATCCACACGGAGTACTTG       |
| Nestin F       | GGCGCACCTCAAGATGTCC        |
| Nestin R       | CTTGGGGTCCTGAAAGCTG        |
| SOX2_f         | TGGACAGTTACGCGCACAT        |
| SOX2_r         | CGAGTAGGACATGCTGTAGGT      |
| cd44-s-f       | ATAATAAAGGAGCAGCACTTCAGGA  |
| cd44-s-r       | ATAATTGTGTCTTGGTCTCTGGTAGC |
| CA XII -F      | ACTGCGGCAGGACTGAGTCT       |
| CA XII -R      | CACAATACAGATGCCAAGAATGC    |
| CD133-F        | GTGTCCTGGGGCTGCTGTTTA      |
| CD133-R        | CCATTTTCCTTCTGTGCTGG       |
| ZEB1-f         | AAGAATTCACAGTGGAGAGAAGCCA  |
| ZEB1-r         | CGTTTCTTGCAGTTTGGGCATT     |

Suppl. Figure S2:  
Antibody specifications relevant for this study.

| Antibodies used in FACS          |            |              |             |                 |
|----------------------------------|------------|--------------|-------------|-----------------|
| Primary Antibody                 | company    | Host species | addition    | Dilution factor |
| CD133/1-PE, human                | Miltenyi   | Mouse        | Monoclonal  | 1:200           |
| CD133/1 Antibody, anti-human, PE | Biotech    |              | Clone AC133 | (5 µl/ml)       |
| Anti-carbonic anhydrase XII      | Sino       | Mouse        | Monoclonal  | 1:200           |
| Antibody (FITC)                  | Biological |              | Clone #07   | (0.5 µl/ml)     |

| Antibodies used in western blot   |                   |              |                                  |                 |
|-----------------------------------|-------------------|--------------|----------------------------------|-----------------|
| Primary Antibody                  | company           | Host species | addition                         | Dilution factor |
| Anti-ZEB1 antibody                | Sigma-Aldrich     | Rabbit       | Polyclonal                       | 1:1000          |
| beta-actin                        | Invitrogen        | Mouse        | Monoclonal                       | 1:5000          |
| GAPDH                             | Proteintech       | Mouse        | Monoclonal                       | 1:8000          |
| CA XII Antibody                   | Proteintech       | Rabbit       | Polyclonal                       | 1:2000          |
| CD133/1 (AC133) antibody, human   | Miltenyi Biotech  | Mouse        | Monoclonal<br><br>(clone W6B3C1) | 1:1000          |
| Secondary Antibody                | company           | species      | addition                         |                 |
| IRDye 680RD Donkey anti-Mouse IgG | LiCor Biosciences | Donkey       | Polyclonal                       | 1:10000         |
| IRDye 800CW Goat anti-Rabbit IgG  | LiCor Biosciences | Goat         | Polyclonal                       | 1:10000         |

**Suppl. Figure S3: Additional clinical datasets verified the significant clinical prognostic value of high CA12 mRNA to predict overall survival of glioma patients.**

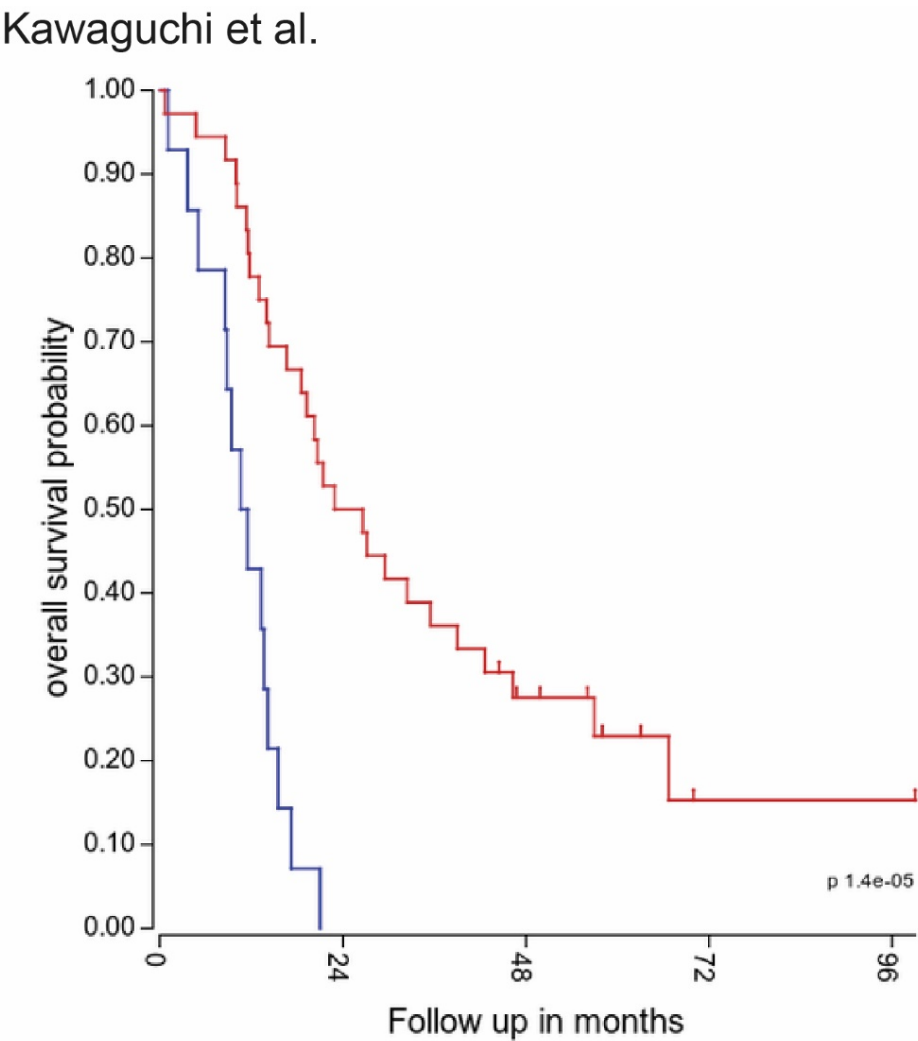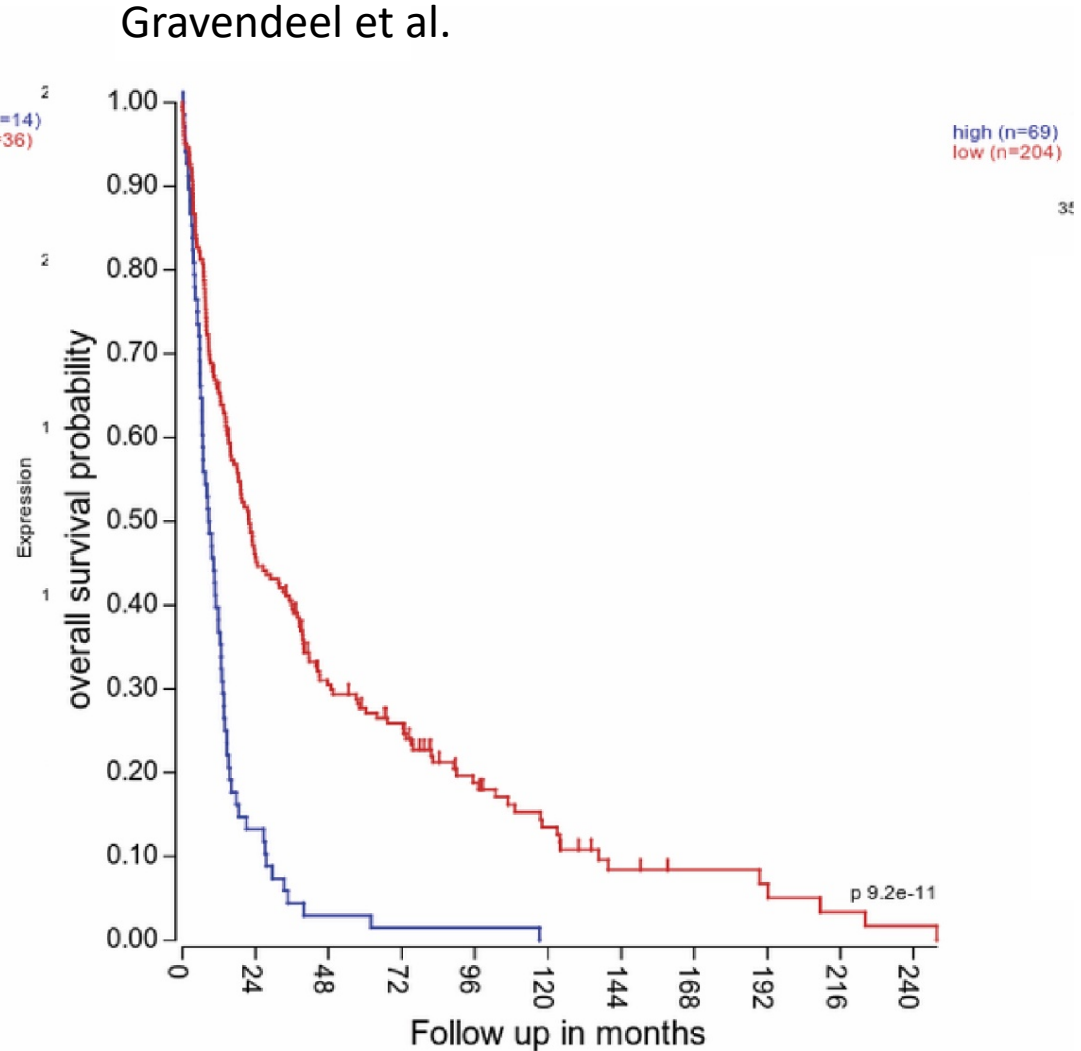

**Suppl. Figure S4:**  
**Biological function and pathway enrichment analysis of CA12 in CGGA, CGGA 2019 and TCGA databases reveals association to networks known to be relevant for the maintenance of cancer stem cells.**

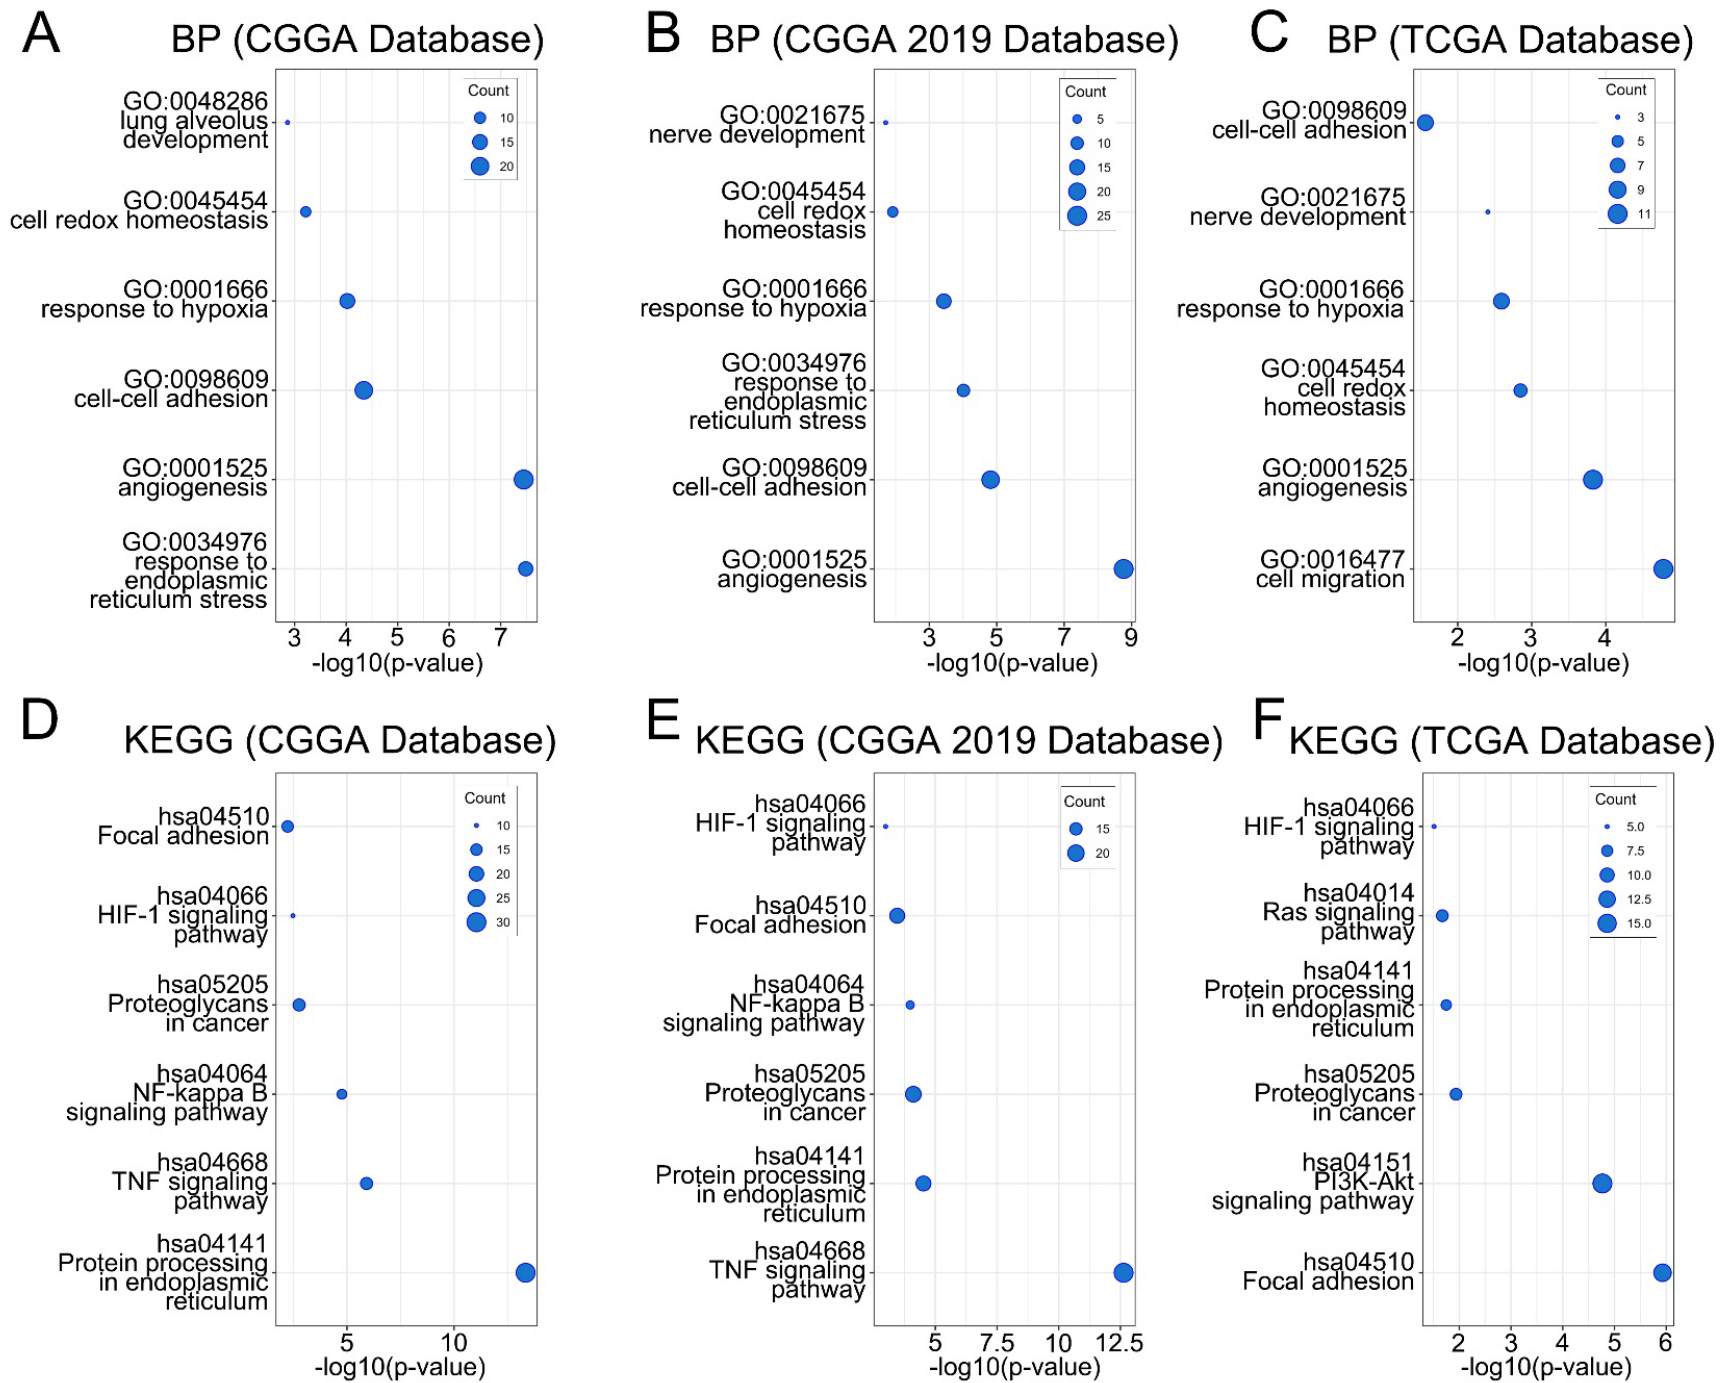

**Suppl. Figure S5:**  
**6A10 treatment with no effect on proliferation, trend of induction of apoptosis in GBM1, no effect on cell cycle progression.**

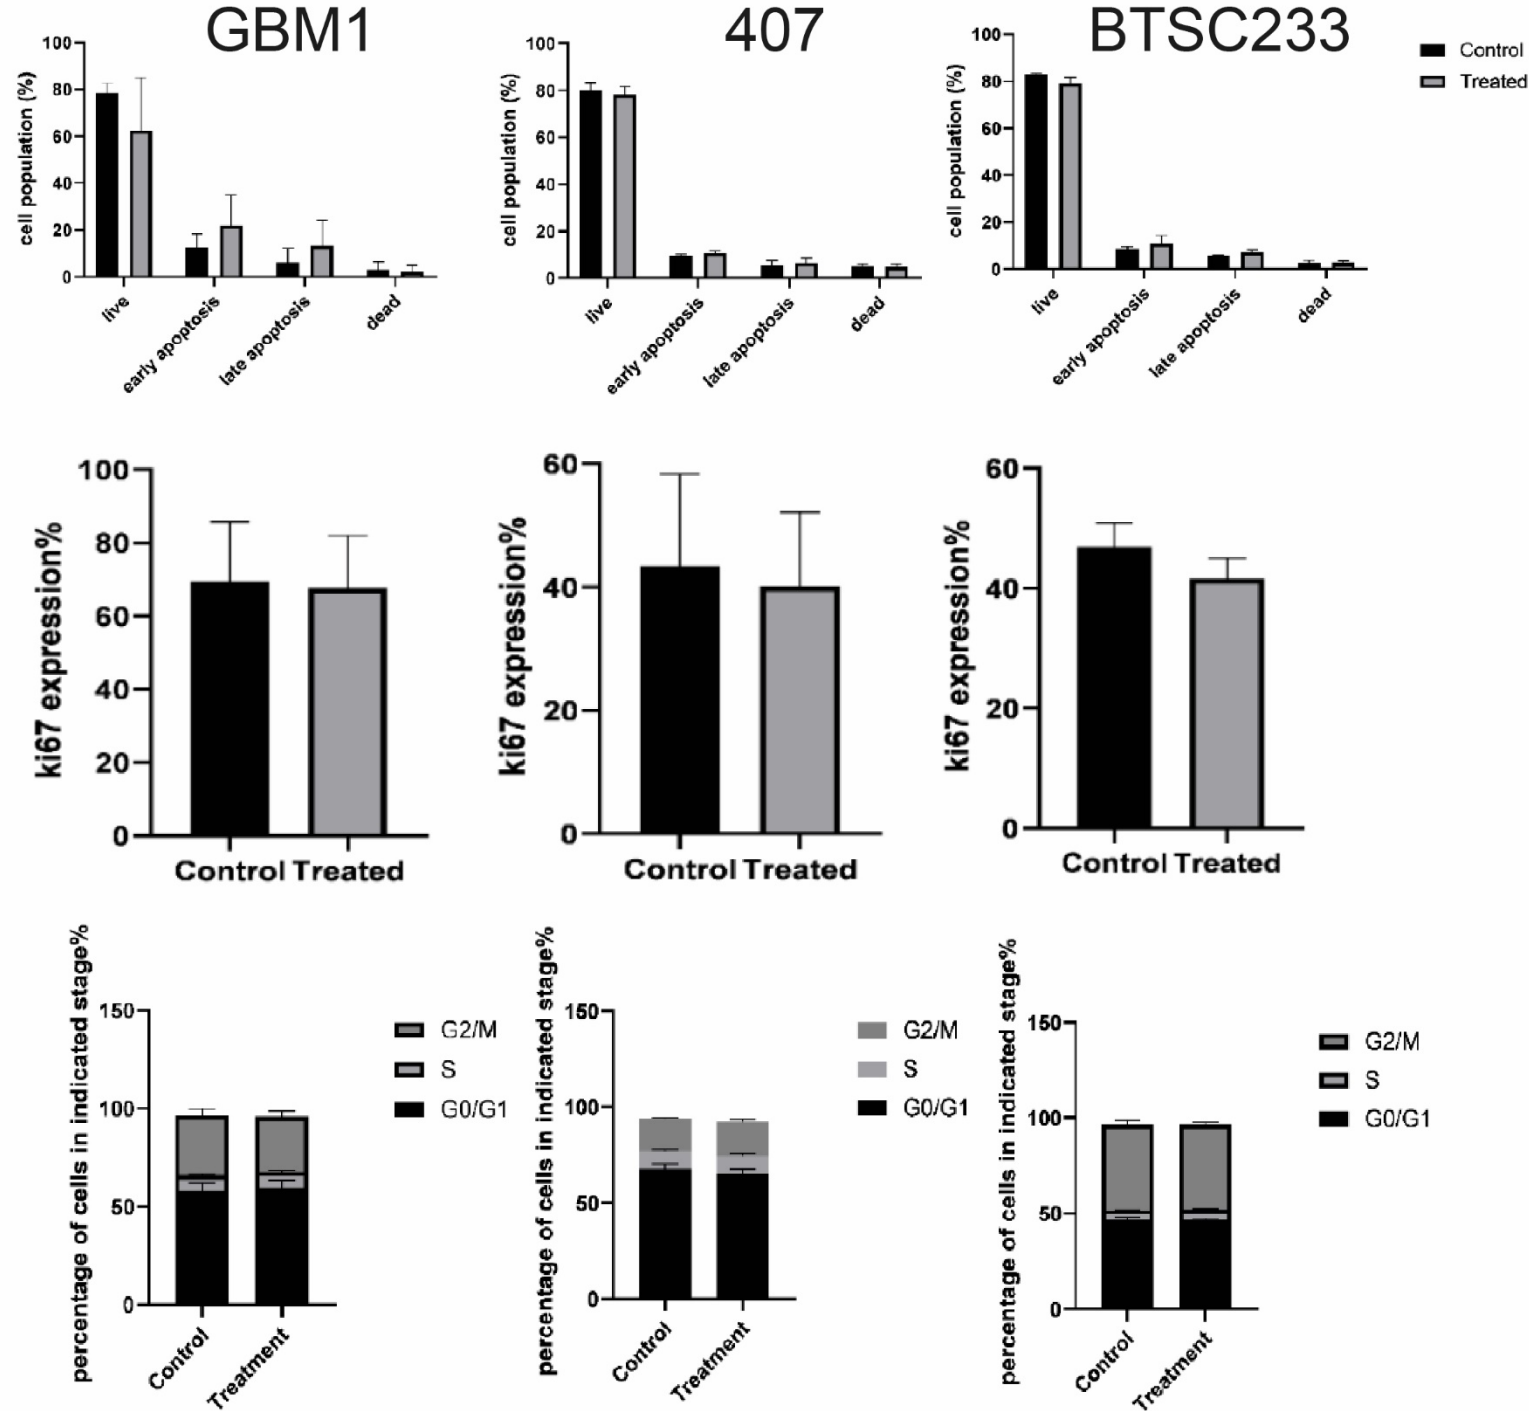

Unsupervised cluster analysis found that CA family members cannot be grouped stably in CGGA (A), CGGA 2019 (B) and TCGA (C) databases. Expression correlation matrix analysis found that CA family members have no stable expression correlation in CGGA (D), CGGA 2019 (E) and TCGA (F) databases.

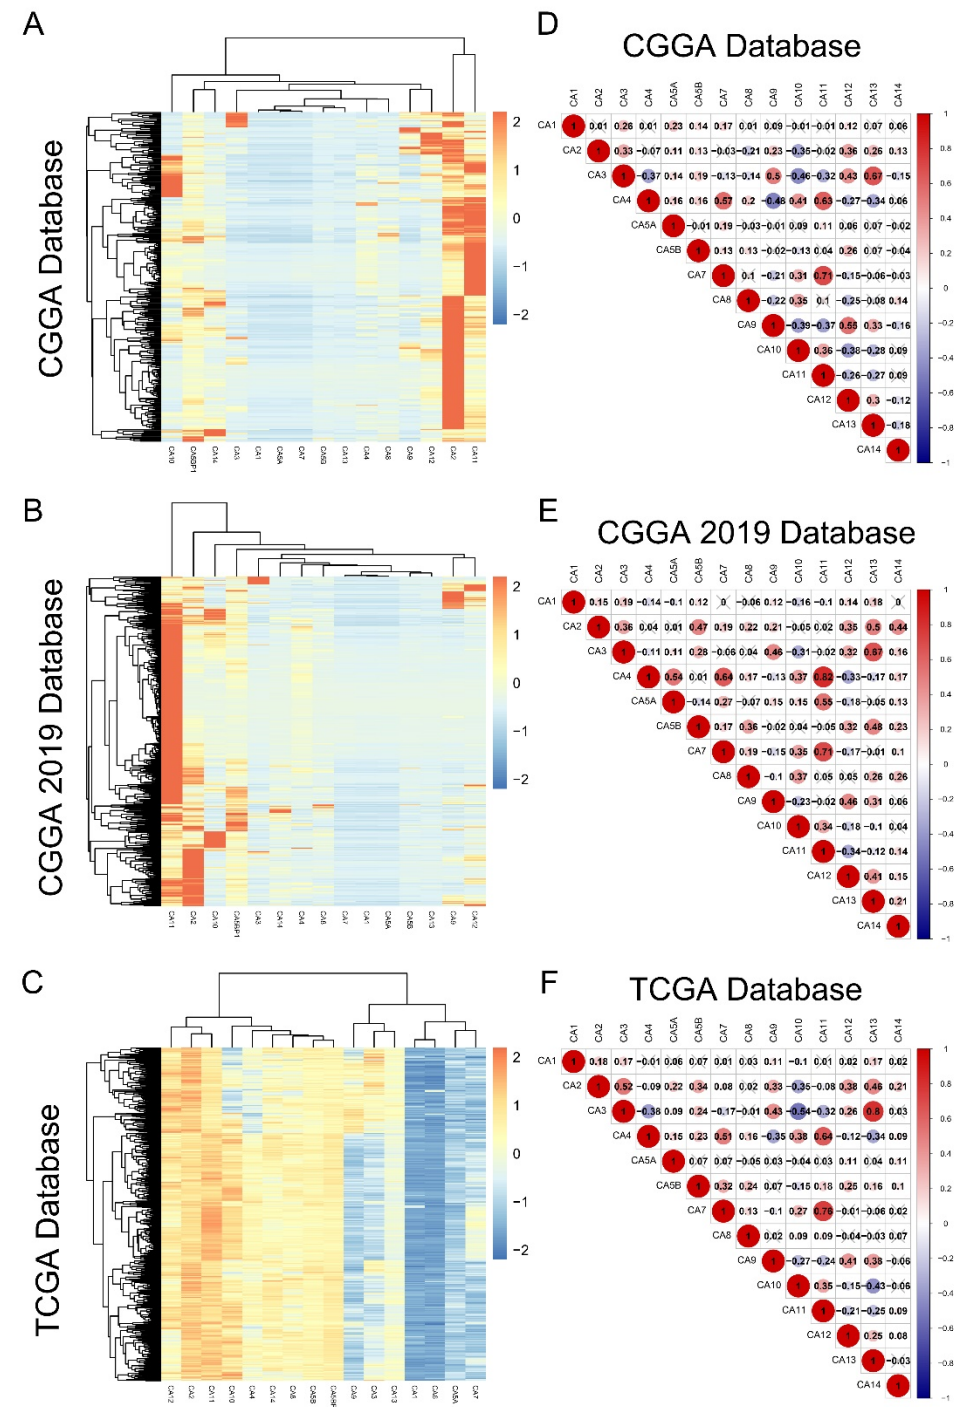

Supplement: Supplementary file 1 [file get_supplementary_file.php]
